# Supplementary material
Source: Springer Nature journal article supplement (https://www.springermedizin.de/resource/supplementary/13075_2009_2719_MOESM2_ESM.pdf/9692740)

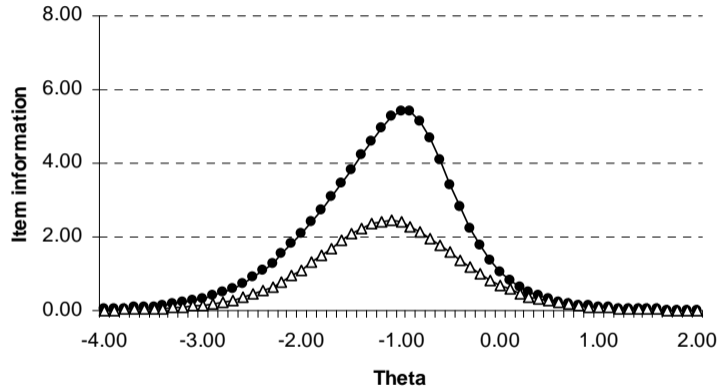

(a) Walking several hundred yards

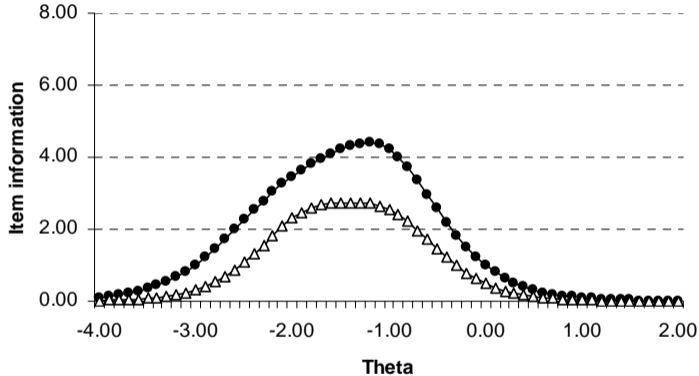

(b) Carrying groceries

Supplement: MOESM2 [file 9692740]
